# Supplementary material
Source: MDPI journal article supplement (https://www.mdpi.com/1999-4907/6/4/1301)
Supplement: s1 [file s1]

Supplementary Information

1. Histories of Land Use Changes and Land Rights for Each Commodity

1.1. Rubber

In the early 20th century, a three-fold increase in the price of rubber from 1905–1910 due to the takeoff of automobile manufacturing led to the conversion of rubber supply from wild harvesting to cultivated production. Rubber produced on plantations mainly in Malaysia increased rapidly from 0.3% of world supply in 1903 to 60% of supply in 1914 [1]. Large-scale rubber plantations expanded mostly at the expense of tropical forests, although the loss of forests was not seen as a problem at the time, but rather as a positive contribution to development [2]. The British colonial government in peninsular Malaysia provided large land concessions from forestlands as an incentive to plantation companies. However, the government recognized and demarcated local land rights under customary tenure (*adat)* early although rather paternalistically, these rights did not allow transfer to
companies [3,4]. In Sumatra, the other center of plantation agriculture, concessions were granted by local rulers, but overseen by the Dutch colonial authorities that proposed model contracts. The details of these contracts were modified periodically, mainly in attempts to accommodate land for shifting agriculture [5]. The most serious land conflicts were in French Indo-China (Vietnam and Cambodia) where virtually free land concessions encouraged land acquisitions well beyond needs and with a higher population density than in Malaya, concessions that accounted for 20% of all farmland often conflicted with use by local communities [6,7].

As a labor-intensive crop with simple processing requirements, rubber was quickly taken up by smallholders [8]. By 1939 they produced over half of rubber in Asia and today this share stands at over 80% [9]. Smallholders also moved away from mono-cropping by integrating rubber into agroforestry systems that reduced risks, spread labor demand, and conserved biodiversity.

Since 2000, with growing demand for rubber in Asia and higher prices for synthetic rubber based on fossil fuels, there has been a renewed surge in rubber planting in response to a sharp rise in prices. Chinese, Vietnamese and Thai companies are investing in Laos, Cambodia, Myanmar, and Côte d’Ivoire to supply their emerging tire industries and land conflicts have re-emerged as major issues [9–11]. The conversion of at least 0.5 Mha of forests and shifting cultivation agriculture to rubber has also been associated with widespread deforestation in Southeast Asia in what call the rubber “juggernaut” [12,13]. However, voluntary standards by the rubber sector to improve sustainability are still in their infancy and draft standards for the Sustainable Rubber Initiative were only published in early 2015.

1.2. Cocoa

Cocoa’s consumption became widespread in the late 19th century when technology facilitated its conversion from a beverage to a solid chocolate bar that could be produced at an industrial scale [14]. By 1900, 125,000 t of cocoa beans were exported mostly from hacienda-style (large-scale) plantations in Latin America, mainly Ecuador and Brazil [15–17]. In the 20th century, labor shortages, soils exhaustion, diseases, and low capital investments reduced the profitability of Latin American production and opened the opportunity for West African countries [17,18]. Portuguese traders had taken the plant from Brazil to the islands of São Tomé and Principe, off the West African coast, where plantations were large suppliers to world markets by 1905 [15]. However, use of forced labor in the Portuguese colonies in West Africa led to a boycott in 1910 by the major British and German chocolate manufactures, spearheaded by Cadburys [19]. Members of the Quaker religious movement that held strong beliefs in human rights and social justice (at least, by the standards of the time) owned the three largest British chocolate manufacturers. The boycott was lifted in 1916, when the Portuguese government committed to improve conditions, but by then cocoa from entrepreneurial smallholder farms in Ghana had become well established in European markets [20].

By 1925, world exports had grown to 500,000 tons, and Ghana was the leading exporter [21], leading to rapid area expansion and serious deforestation [22]. A colonial Land Ordinance of 1876 had confirmed the rights of traditional local authorities’ over forests and other non-cultivated lands in Ghana [22]. This was further re-enforced when British colonial administrators tried to enact laws to govern forest and “wastelands” in the 1890s [23] resulting in strong protests by the local Aborigines Rights Protection Society (ARPS). Led by African professionals and some chiefs, the ARPS mounted a media campaign and sent a delegation to London in 1898 that successfully lobbied for the withdrawal of the bill [24]. The newly created forest department was closed in 1917 and only in 1928, after widespread loss of forest became widely recognized as a problem by local communities, were some forest reserves established under management of the chiefs at the urging of colonial officials [22,25].

After independence, Ghana’s industry stagnated, due to high taxation [20], and production
shifted to Côte d’Ivoire that became the world’s largest exporter in the 1980s, again based on small and medium-scale producers. State policies strongly encouraged immigration to meet labor shortages and low-cost access to forestland for cocoa expansion that led to extensive deforestation [26,27]. As Ruf [28] has stated “cocoa equals consumption of tropical forests”. The closing of the forest frontier by the end of the 20th century also resulted in growing competition for land between local communities and immigrant groups that escalated into ethnic conflicts and a tragic decade-long civil war [29].

Indonesia’s smallholders took up cocoa production, starting in the 1990s, making the country the world’s second largest producer in just a couple decades. Reminiscent of the earlier booms in West Africa, individual migrant farmers led the expansion independently of government programs [28]. Smallholder “land grabbing” and local land tensions characterized the Indonesian expansion [30,31].

In the 21th century concerns about use of child labor and indentured labor as well as continuing deforestation have resulted in recent private–sector led efforts to improve sustainability standards of smallholder cocoa. From a very small beginning in 2010, certification has risen sharply to reach about 16% of global cocoa supply in 2013, mainly under the UTZ certification system, a third-party independent foundation that verifies compliance with standards [32]. Scaling up of certification is challenging given the large number of unorganized smallholders, weak capacity of the associations of cocoa growers to enforce standards, and the generally poor governance of land and forest resources in the two largest cocoa producing countries, Côte d’Ivoire and Indonesia [33].

1.3. Oil Palm

During the early 20th century demand for food uses of palm oil including for the newly invented margarine rapidly increased [34]. Lever Brothers (a predecessor of Unilever), the major trading and manufacturing company for palm oil, sought land concessions for large-scale plantations in Nigeria. The British colonial government rejected these efforts in 1905, 1907, and again in 1920 [35–37] in the wake of a global outcry on human rights abuses in harvesting wild rubber in the Congo in the first decade of the 20th century [38] that made colonial officials more sensitive to at least appearing to respect the land rights of indigenous populations. British colonial officials recognized the authority of local chiefs on land matters and opposed plantation agriculture, believing it would infringe on the land and labor rights of smallholders and that smallholders would be the most efficient suppliers for world markets [37,39]. The Nigerian Land and Native Rights Proclamation was drawn up in 1911 and favorably reviewed by Edmund Morel, whose fame had been established in exposing human rights violations in the Congo rubber trade [40]. A West African Lands Commission 1915, of which Morel was a member, re-enforced land rights of Africans and recommended a smallholder approach to development.

After being rejected by British colonial authorities, Lever Brothers obtained a very large concession in the then Belgian Congo where they were able to successfully cultivate the palm [35–37]. The land concession included specific clauses on labor and land rights—minimum wages, recognition of indigenous rights on wild palms, and provision of health and schools [36]. However, implementation in practice often involved harsh labor practices and conflict with villages over harvesting rights of wild trees that led to periodic intervention from Brussels [41]. Lever’s Huileres du Congo Belge (HCB) grew to become the largest oil palm plantation in the world by 1960 [35].

Oil palm technology was transferred from the Congo to Sumatra, Indonesia around 1915 and then to Malaysia, by the predecessor of today’s global palm oil company, SOCFIN, based in Belgium [42]. Land concessions were used as an incentive as in the case of rubber. With declining rubber prices in the 1960s, Malaysia took a strategic decision to diversify from rubber and greatly increased productivity of the crop, building on both production and milling technology from the Congo where exports were declining in the difficult years after independence. Oil palm expanded rapidly through substitution for rubber and in large part through expansion into forest areas [43], to convert Malaysia into the dominant exporter from 1970 to 2008. Since 1990, there has been explosive expansion of oil palm in Indonesia aided by investors from Malaysia and Singapore, in response to rising wages and land scarcity in Malaysia. Indonesia is now the world’s largest palm oil producer and exporter, with an estimated total area of 10 Mha under cultivation [44].

Most of the oil palm in Indonesia has been established on concessions provided to companies by the government from land classified as part of the state forest estate [44]. Although much of this land was already heavily logged and degraded, the rapid expansion of oil palm has been associated with Indonesia becoming the country with the most serious loss of tropical forests, some of it of high conservation value. Over one third of the 6.4 Mha of oil palm planted from 1990–2010 was on previously forested
land [45], still way below the 24 Mha of land deforested during this period. In addition, the major land conflicts from plantations in Asia have surfaced in modern times from the oil palm boom in Indonesia, and in Sarawak and Sabah states of Malaysia. Indigenous land rights on the forest frontier have been poorly defined and the high profits from oil palm have encouraged rent-seeking activities of companies to pressure local officials to override customary rights [46,47]. In Indonesia where about 40% of oil palm area is under smallholders, a significant share of recent land conflicts as well as deforestation relate to smallholders and immigrants that have been attracted to the frontier [44,48].

In the ultimate irony of globalization, Asian firms driven by growing difficulty in accessing land and global concerns about high rates of deforestation in Indonesia are now moving aggressively into Africa. After a century, deforestation and land rights associated with large oil palm investments have re-emerged in Africa as major concerns [49,50].

The continuing pace of deforestation in Southeast Asia and recurrent land conflicts associated with oil palm expansion have made oil palm the focus of a global outcry about the negative impacts of global commodity production in the 21st century. As Corley and Tinker [51] note the standard reference on oil palm production has progressed from including several pages on how to clear and burn forests in the 1988 edition to a chapter on how to enhance sustainability through conserving forests in their 2015 edition [51].

Given the failure of state-led efforts to sustainably manage oil palm expansion, the private sector has taken the initiative to improve standards through the Roundtable for Sustainable Palm Oil (RSPO). The RSPO is an industry led multi-stakeholder group founded in 2004 that has developed a set of principles and criteria for defining socially and environmentally sustainable palm oil, with a strong emphasis on restricting conversion of forestland and respecting land rights of local communities [52]. In late 2014, the large trading companies have committed to buying palm oil that aims for zero deforestation, and the Government of Indonesia has placed its own moratorium on further concessions, albeit with a number of loopholes [53].

1.4. Bananas

The expansion of banana exports and consumption in the early 20th century was unprecedented.
In 1900 the fruit was widely consumed locally in the tropics, but only by a few urban elites of the US; 30 years later it was a mass consumption item in the diet of working class North Americans [54]. Most of this appetite was supplied by Central America and later Colombia and Ecuador, from very large plantations that resulted in major land transformations in the tropical coastal areas of the region [55,56].

In the early 1900s, the United Fruit Company (now Chiquita) invested heavily in establishing a fully integrated banana supply chain and developing infrastructure anchored in state concessions of forestland in Costa Rica, Honduras, Ecuador, Guatemala, Panama, and Colombia [55,56]. Because plant diseases were a major problem in large-scale banana mono-cropping, companies employed a land-extensive method of production that involved shifting cultivation every few years (to control disease outbreaks) and recurrent cycles of forest clearing. The land areas controlled were sometimes as much as 20 times the area actually planted as huge land grants in mostly forested areas were mediated through government concessions and some private sales at very low rates. At its peak in 1935, United Fruit owned around 1.4 million ha of land in Central America—making it the largest farmland holder in the world at that time [57]. Only after 1950, with the advent of the Cavendish banana variety and wide adoption of pesticides for disease control, has export banana production been converted to permanent cultivation systems [58].

The large areas involved not only resulted in large-scale local deforestation [59–61] but also conflicts with local land users. The very large concessions to banana companies were given, for the most part, on what was considered state lands [62,63]. But land conflicts emerged as cadastral information was of poor quality and many claims to land by smallholders had not been formalized at the time of granting concessions. Investment in infrastructure and labor demands for plantations led to large flows of migrants to frontier areas leading to further competition for land [57,63,64].

Although the banana story is closely associated with the rise and fall of United Fruit and a handful of other large multinational companies, by 1950 production had shifted decisively to the more favorable climates of the coasts and inland valleys of Colombia and Ecuador. In Ecuador restrictions on land ownership by foreign companies and the rise of entrepreneurial national companies led to contracting with small and medium farmers [65]. Ecuador emerged as the world’s leading banana exporter in the 1950s based on small and medium sized producers and has maintained that position since [66].

Not surprisingly, companies such as United Fruit—very large in relation to the small economies of Central America—exerted considerable political influence over local land policies. A law to impose maximum land holdings in Honduras in the 1911 was retracted after pressure from banana companies [3]. In Guatemala in 1954, a military coup backed by the U.S. government overthrew an elected government that had introduced land reform legislation to take over unused land from banana companies [57]. The lands were later restituted, but the episode, together with labor disputes in Costa Rica and Colombia, led to an increasing negative press exposure and unease of United shareholders regarding their investments in Central America [55]. Under pressure from shareholders, low prices and an anti-monopoly suite by the US government, both the United Fruit Company (Chiquita today) and Standard Fruit (Dole today) started divesting in plantation assets in Latin America from the 1950s and contracted with small and medium-scale producers. In Ecuador now the dominant exporter, average farm size is 23 ha and over half of producers have under 10 ha [67].

In 2010, 17 Mt of bananas were traded (about 20% of global production) with emerging economies of Eastern Europe and East Asia becoming major importers. Chiquita, Dole, and Del Monte, all descendants of the original banana companies, still dominate global trade [68]. The move to permanent cultivation systems and improved state-led regulation and enforcement over forestlands in some producers, especially in Costa Rica [69], has generally reduced the pressure from bananas on forestland. Indeed, abandoned banana lands have often been converted to cocoa or oil palm [61,70]. The shift from large plantations to contract farming has also eased land conflicts with smallholders and local communities.

Like the other commodities, bananas have shifted toward private standards, with the Rainforest Alliance as the most important certifying body. In the early 1990s, United Fruit (Chiquita) initiated one the first private certification efforts for a tropical commodity. Concerns about food safety and workers’ health due to high pesticide use on bananas were a primary motivation for certification although the continuing threat to tropical forests was also an important influence. Today 100% of Chiquita’s bananas are certified, and an increasing share of Dole bananas purchased in Central America and Colombia are also being certified [71].

2. Progress on Labor Rights

Given the disastrous record of slave labor on plantations in the pre-modern era, it is not surprising that labor rights remained important in commodity production into the modern era. Well after slavery was abolished, human rights issues associated with tropical commodities continued to attract global attention. The attempt to introduce plantations into West Africa took place against the backdrop of widespread abuse of human rights of rubber harvesters in the then Congo Free State under King Leopold of Belgium that spearheaded one of the first global human rights’ campaigns associated with tropical crops, led by British civil society [72]. British colonial administrators as well as private companies were thus sensitized to indigenous rights, leading to rejection of the Lever Brothers request to establish oil palm plantations as well as Cadbury’s decision to ban cocoa imports from Portuguese colonies and source from Ghana [19].

The Malayan plantation industry was built on indentured labor that was subject to well-publicized abuses [73]. After the termination of indentured labor in 1914, conditions gradually improved with a minimum wage law in 1924 and full labor legislation by 1929 [74]. United Plantations, then the leading oil palm company, made a strong commitment to labor standards from the 1920s, including provision of health and schooling [75]. Elsewhere progress was slower with continuing controversy over labor rights and conditions in the Netherlands Indies that led to negative media exposure in the metropolitan powers, and official enquiries by the metropolitan government [76].

Labor rights were also the focus of early inter-governmental efforts to improve standards, given the rising trade union movement in the early 20th century and the fact that much plantation labor was based on international migration. The International Labor Organization was founded by the League of Nations in 1919 and mounted labor inspections on plantations in Malaysia in the 1920s [77]. An International Convention on Forced Labor, motivated by conditions on plantations, was agreed in 1930. Although weakened by exceptions, the convention was adopted by the major colonial
powers (except Portugal) that dominated the League, and contributed to gradually improving labor conditions [78].

Although labor rights have continued to be an issue in plantation agriculture, the early focus by governments, civil society and international bodies has undoubtedly led to steady progress in improving labor standards on plantations owned by large national and multinational companies. Our review suggests that labor rights are now more likely to arise with small and medium size family farms, such as for cocoa in Côte d’Ivoire [79] and smaller companies producing oil palm in Indonesia than in large multinational companies [80].

References

1. Munro, J.F. Monopolists and speculators: British investment in West African rubber, 1905–1914.
   *J. Afr. Hist.* **1981**, *22*, 263–278.
2. Beinart, W.; Lotte, H. *Environment and Empire*; Oxford University Press: Oxford, UK, 2007.
3. Tate, D.J.M. *The RGA History of the Plantation Industry in the Malay Peninsula*; Oxford University Press: New York, NY, USA, 1996.
4. Courtenay, P.P. The Plantation in Malaysian Economic Development. *J. Southeast Asian Stud.* **1981**, *12*, 329–348.
5. Pelzer, K.J. *Planter and Peasant: Colonial Policy and the Agrarian Struggle in East Sumatra 1863–1947*; Martinus Nijhoff: The Hague, The Netherlands, 1978.
6. Murray, M.J. *The Development of Capitalism in Colonial Indochina (1870–1940)*; University of California Press: Berkeley, CA, USA, 1980.
7. Booth, A. *Colonial Legacies Economic and Social Development in East and Southeast Asia*; University of Hawaii Press: Honolulu, HI, USA, 2007.
8. Bauer, P.T. *The Rubber Industry, a Study in Competition and Monopoly*; Harvard University Press: Cambridge, MA, USA, 1948.
9. Byerlee, D. The fall and rise again of plantations in tropical Asia: History repeated? *Land* **2013**, *3*, 574–597.
10. Global, W. Rubber Barons: How Vietnamese Companies and International Financiers are Driving a Land Grabbing Crisis in Cambodia and Laos. Available online: http://www.globalwitness.
    org/rubberbarons/ (accessed on 11 April 2015).
11. Hicks, C.; Voladeth, S.; Shi, W.; Guifeng, Z.; Lei, S.; Tu, P.Q.; Kalina, M. *Rubber Investments and Market Linkages in Lao PDR: Approaches for Sustainability*? Sustainable Mekong Research Network: Bangkok, Thailand, 2009.
12. Li, H.; Aide, T.M.; Ma, Y.; Liu, W.; Cao, M. Demand for rubber is causing the loss of high diversity rain forest in SW China. *Biodivers. Conserv.* **2007**, *16*, 1731–1745.
13. Ziegler, A.D.; Fox, J.M.; Xu, J. The rubber juggernaut. *Science* **2009**, *324*, 1024–1025.
14. Wood, G.A.R.; Lass, R.A. *Cocoa*; Longman Scientific & Technical: London, UK, 1987.
15. Clarence-Smith, W.G.; Ruf, F. Cocoa Pioneer Fronts: The Historical Determinants.
    In *Cocoa Pioneer Fronts Since 1800: The Role of Smallholders, Planters, and Merchants*; Clarence-Smith, W.G., Ed.; St. Martin’s Press: New York, NY, USA, 1996; pp. 1–22.
16. Leiter, J.; Harding, S. Trinidad, Brazil, and Ghana: Three melting moments in the history of cocoa. *J. Rural Stud.* **2004**, *20*, 113–130.
17. Roberts, L.J. *El Ecuador en la Epoca Cacaotera: Respuestas Locales al Auge y Colapso en el Ciclo Monoexportador*; Gráficas Iberia: Quito, Ecuador, 2010.
18. Mahoney, M.A. The Local and the Global: Internal and External Factors in the Development of Brazil’s Cacao Sector. In *Latin America and the Global Economy: A Commodity Chains’ Perspective*; Steven, T., Carlos, M., Zephyr, F., Eds.; Duke University Press: Durham, NC, USA, 2006.
19. Higgs, C. *Chocolate Islands: Cocoa, Slavery, and Colonial Africa*; Ohio University Press: Athens, OH, USA, 2012.
20. Hill, P. *The Migrant Cocoa-Farmers of Southern Ghana: A Study in Rural Capitalism*; University Press: Cambridge, UK, 1963.
21. Ryan, O. *Chocolate Nations: Living and Dying for Cocoa in West Africa*; Zed Books Ltd.: New York, NY, USA, 2011.
22. Grove, R. *Ecology, Climate, and Empire: Colonialism and Global Environmental History,
    1400–1940*; White Horse Press: Cambridge, UK, 1997.
23. Amanor, K. *Global Restructuring and Land Rights in Ghana: Forest Food Chains, Timber, and Rural Livelihoods*; Nordiska Afrikainstitutet: Uppsala, Sweden, 1999.
24. Anshan, L. *British Rule and Rural Protest in Southern Ghana*; Peter Lang: New York, NY,
    USA, 2002.
25. Thompson, H.N. *Gold Coast Report on Forests*; London Printed for H.M. Stationery Off. by Darling: London, UK, 1910.
26. Dumont, E.S.; Gnahoua, G.M.; Ohouo, L.; Sinclair, F.L.; Vaast, P. Farmers in Côte d’Ivoire value integrating tree diversity in cocoa for the provision of ecosystem services. *Agrofor. Syst.* **2014**, *88*, 1–20.
27. Hecht, R.M. Immigration, land transfer and tenure changes in Divo, Ivory Coast, 1940–1980. *Africa* **1985**, *55*, 319–336.
28. Ruf, F.; Ehret, P.; Yoddang, C.T. Smallholder cocoa in Indonesia: Why a cocoa boom in Sulawesi? In *Cocoa Pioneer fronts Since 1800: The Role of Smallholders, Planters, and Merchants*; Clarence-Smith, W.G., Ed.; Mac Millan: London, UK, 1996.
29. Woods, D. The Tragedy of the Cocoa Pod: Rent-Seeking, Land and Ethnic Conflict in Ivory Coast.
    *J. Mod. Afr. Stud.* **2003**, *41*, 641–655.
30. Li, T.M. Local Histories, Global Markets: Cocoa and Class in Upland Sulawesi. *Dev. Chang.* **2002**, *33*, 415–437.
31. Hall, D. Land grabs, land control, and Southeast Asian crop booms. *J. Peasant Stud.* **2011**, *38*, 837–857.
32. Potts, J.; Matthew, L.; Ann, W.; Gabriel. H.; Maxine, C.; Vivek, V. *The State of Sustainability Initiatives Review 2014: Standards and the Green Economy*; International Institute for Sustainable Development, Manitoba and the International Institute for Environment and Development: London, UK, 2014.
33. IIED, Sustainable-FoodLab. Certified Cocoa: Scaling Up Farmer Participation in West Africa. Available online: http://pubs.iied.org/pdfs/16034IIED.pdf/ (accessed on 4 April 2015)
34. Lynn, M. *Commerce and Economic Change in West Africa the Palm Oil trade In the Nineteenth Century*; Cambridge University Press: New York, NY, USA, 1997.
35. Martin, S.M. *Palm Oil and Protest: An Economic History of the Ngwa Region, South-Eastern Nigeria, 1800–1980*; Cambridge University Press: Cambridge, UK, 1988.
36. Fieldhouse, D.K. *Unilever Overseas: The Anatomy of a Multinational 1895–1965*; Croom Helm: London, UK, 1978.
37. Wilson, C. *The History of Unilever*; Cassell: London, UK, 1954; Volume 2.
38. Usoro, E.J. *The Nigerian Oil Palm Industry: (Government Policy and Export Production,
    1906–1965)*; Ibadan University Press: Ibadan, Nigeria, 1974.
39. Hochschild, A. *King Leopold’s Ghost: A Story of Greed, Terror, and Heroism in Colonial Africa*; Houghton Mifflin: Boston, MA, USA, 1998.
40. Udo, R.K. Sixty Years of Plantation Agriculture in Southern Nigeria: 1902–1962. *Econ. Geogr.* **1965**, *41*, 356–368.
41. Morel, E.D. *Nigeria: Its Peoples and Its Problems*; Smith, Elder and Co.: London, UK, 1911.
42. Marchal, J. *Lord Leverhulme’s Ghosts: Colonial Exploitation in the Congo*; Verso: London,
    UK, 2008.
43. Martin, S.M. *The UP Saga*; NIAS Press: Copenhagen, Denmark, 2004.
44. Miyamoto, M.; Mohd Parid, M.; Noor Aini, Z.; Michinaka, T. Proximate and underlying causes of forest cover change in Peninsular Malaysia. *For. Policy Econ.* **2014**, *44*, 18–25.
45. Douglas, S.; Casson, A.; Jeijaard, E.; van Noordwijk, M.; Gaskell, J.; Sunderland-Groves, J.; Wertz, K.; Kanninen, M. *The Impacts and Opportunities of Oil Palm in Southeast Asia: What do We Know and What do We Need to Know*? CIFOR: Bogor, Indonesia, 2009.
46. Gunarso, P.; Manjela, E.H., Fahmuddin, A.; Timothy, J.K. *Oil Palm and Land Use Change in Indonesia, Malaysia and Papua New Guinea. Report from the Technical Panels of the 2nd Greenhouse Gas Working Group*; RSPO: Kuala Lumpur, Malaysia, 2013.
47. Colchester, M.; Norman, J.; Sophie, C. Conflict or Consent? Oil Palm Expansion and Community Rights. In Proceedings of the Annual World Bank Conference on Land and Poverty, the World Bank—Washington, DC, USA, 8–11 April 2013.
48. Cramb, R.A. *Land and Longhouse: Agrarian Transformation in the Uplands of Sarawak*; NIAS Press: Copenhagen, Denmark, 2007.
49. International Finance Corporation. *Diagnostic Study on Indonesian Oil Palm Smallholders*;
    IFC: Washington, DC, USA, 2013.
50. Hoyle, D.; Levang, P. *Oil Palm Development in Cameroon*; WWF & IRD/CIFOR: Yaoundé, Cameroon, 2012.
51. Oxford Economics. *Making FDI Work for Subsaharan Africa: Lessons from Liberia*; Oxford Economics: London, UK, 2014.
52. Corley, R.H.V.; Tinker, P.B. *The Oil Palm*,5th ed.; Wiley: Oxford, UK.
53. Roundtable on Sustainable Palm Oil (RSPO), 2013. RSPO Principles and Criteria for the Production of Sustainable Palm Oil. Available online: http://www.rspo.org/en/document_principle
    _and_criteria_certification (accessed on 30 June 2014).
54. Edwards, D.P.; Koh, L.P.; Laurance, W.F. Indonesia’s REDD+ pact: Saving imperiled forests or business as usual? *Biol. Conserv.* **2012**, *151*, 41–44.
55. Bucheli, M. *Bananas and Business: The United Fruit Company in Colombia, 1899–2000*;
    New York University Press: New York, NY, USA, 2004.
56. Beckford, G.L. *Persistent Poverty; Underdevelopment in Plantation Economies of the Third World*; Oxford University Press: New York, NY, USA, 1972.
57. Crowther, S. *The Romance and Rise of the American Tropics*; Doubleday, Doran & Co.: Garden City, NY, USA, 1929,
58. Striffler, S.; Mark, M. *Banana Wars: Power, Production, and History in the Americas*; Duke University Press: Durham, UK, 2003.
59. Wunder, S. Ecuador Goes Bananas: Incremental Technological Change and Forest Loss.
    In *Agricultural Technologies and Tropical Deforestation*; Angelsen, A., Kaimowitz, D., Eds.; CAB International: Wallingford, UK, 2001.
60. Jones, C.F.; Morrison, P.C. Evolution of the banana industry of Costa Rica. *Econ. Geogr.* **1952**, *28*, 1–19.
61. Steed, B. Completing the mosaic: The conservation of private lands in Costa Rica. *J.* *Land Resourc. Envt. L* **2003**, *23*, 173–218.
62. Veldkamp, E.; Weitz, A.M.; Staritsky, I.G.; Huising, E.J. Deforestation trends in the Atlantic Zone of Costa Rica: A case study. *Land Degrad. Dev.* **1992**, *3*, 71–84.
63. Moberg, M. Crown Colony as Banana Republic: The United Fruit Company in British Honduras, 1900–1920. *J. Latin Am. Stud.* **1996**, *28*, 357–381.
64. Soluri, J. *Banana Cultures: Agriculture, Consumption, and Environmental Change in Honduras and the United States*; University of Texas Press: Austin, TX, USA, 2005.
65. Striffler, S. *In the Shadows of State and Capital: The United Fruit Company, Popular Struggle, and Agrarian Restructuring in Ecuador, 1900–1995*; Duke University Press: Durham, NC, USA, 2002.
66. Southgate, D.; Roberts, L. Forthcoming. *Globalized Fruit: Transnational Firms, Tropical Entrepreneurs and Governments, and Independent Banana Development*; University of Pennsylvania Press: Philadelphia, PA, USA, 2014.
67. Tucker, R.P. *Insatiable Appetite: the United States and the Ecological Degradation of the Tropical World*; University of California Press: Berkeley, CA, USA, 2000.
68. UNCTAD. *World Investment Report 2009: Transnational Corporations, Agricultural Production, and Development*; United Nations: New York, NY, USA; Geneva, Switzerland, 2009.
69. Vega, H. *The Banana Sector in Ecuador: Trade, Supply Chain and US Cooperation. Global Agricultural Information Network, Report EC1109*; USDA: Washington, DC, USA, 2011.
70. Fagan, M.E.; DeFries, R.S.; Sesnie, S.E.; Arroyo, J.P.; Walker, W.; Soto, C.; Chazdon, R.L.; Sanchun, A. Land cover dynamics following a deforestation ban in northern Costa Rica.
    *Environ. Res. Lett.* **2013**, *8*, 1–9.
71. Chiquita™. Available online: http://www.chiquita.com/The-Chiquita-Difference/Sustainability/
    The-Rainforest-Alliance.aspx (accessed on 11 April 2015).
72. Hochschild, A. *King Leopold’s Ghost: A Story of Greed, Terror, and Heroism in Colonial Africa*; Houghton Mifflin: Boston, MA, USA, 1998.
73. Drabble, J.H. *An Economic History of Malaysia, c.1800-1990: The Transition to Modern Economic Growth*. Macmillan Press: London, UK and St. Martin’s Press: New York, USA, 2000.
74. Tate, D.J.M. *The RGA History of the Plantation Industry in the Malay Peninsula*; Oxford University Press: New York, NY, USA, 1996.
75. Martin, S.M. *The UP Saga*; NIAS Press: Copenhagen: Denmark, 2004.
76. Courtenay, P.P. The Plantation in Malaysian Economic Development. *J. Southeast Asian Stud.* **1981**, *12*, 329–348.
77. Pelzer, K.J. *Planter and Peasant: Colonial Policy and the Agrarian Struggle in East Sumatra 1863–1947*; Martinus Nijhoff: The Hague, The Netherlands, 1978.
78. Rodgers, G.; Lee, E.; Swepston, L.; van Daele, J. *The International Labour Organization and the Quest for Social Justice, 1919–2009*; Cornell University Press: Ithaca, NY, USA; ILO: Geneva, Switzerland, 2009.
79. Anti-Slavery International. The Cocoa Industry in West Africa: A History of Exploitation. Accessed online: http://www.antislavery.org/includes/documents/cm_docs/2008/c/cocoa_
    report_2004.pdf (accessed on 1 August 2014).
80. Pye, O.; Daud, R.; Harmono, Y. Precarious lives: Transnational biographies of migrant oil palm workers. *Asia Pac. Viewp.* **2012**, *53*, 330–342.

© 2015 by the authors; licensee MDPI, Basel, Switzerland. This article is an open access article distributed under the terms and conditions of the Creative Commons Attribution license (http://creativecommons.org/licenses/by/4.0/).
